# Supplementary material
Source: publisher site journal article supplement (https://www.dovepress.com/article/422492)
Supplement: Supplementary file 1 [file get_supplementary_file.php]

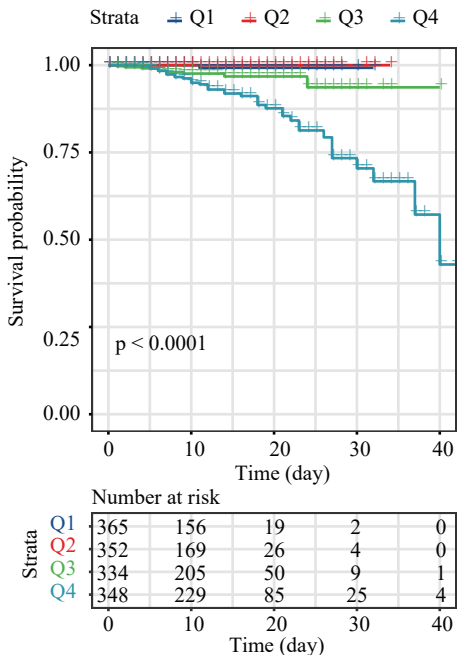

**Supplementary figure 1** Kaplan-Meier survival curve shows the cumulative incidence of death.

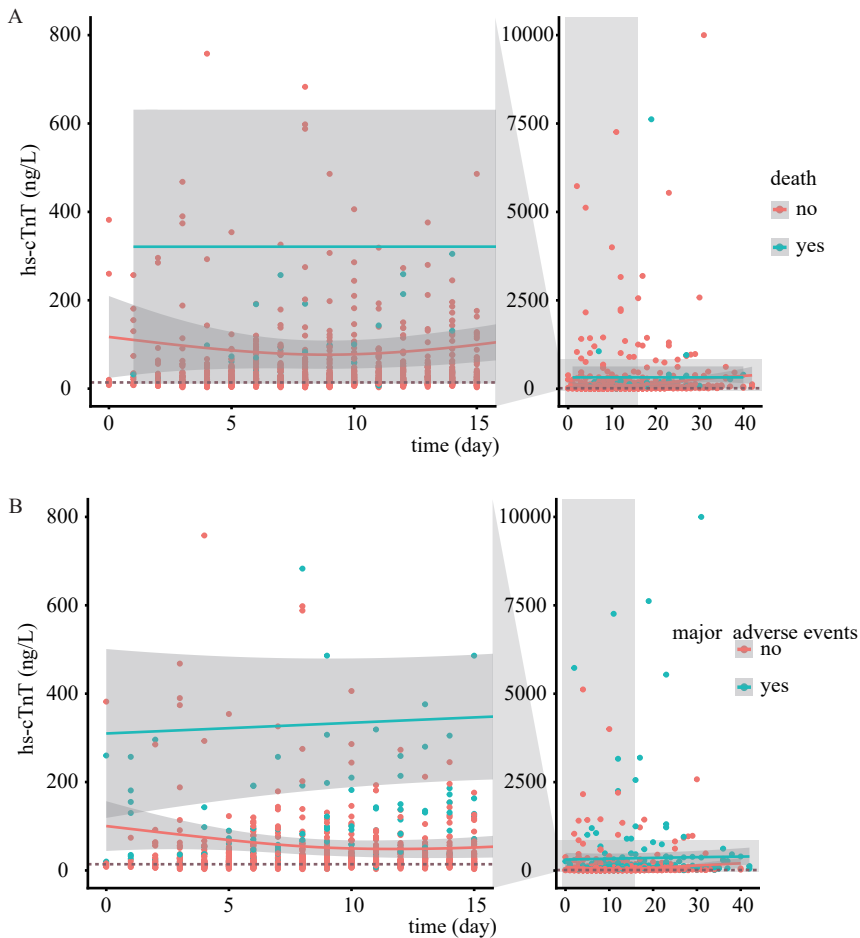

**Supplementary figure 2** Comparison of the hs-cTnT dynamic changes in the groups of different outcomes. (A) death, (B) major adverse events.
